# Supplementary material
Source: PubMed Central journal article supplement (PMC2831218)
Supplement: mmc1.pdf [file mmc1.pdf]

## Samples

### Case-Control Cohorts

|                            | Cases  | Controls | Power <sup>†</sup> / % |
|----------------------------|--------|----------|------------------------|
| <b>Australia (AUS)</b>     | 472    | 424      | 32.4                   |
| <b>Belgium (BEL)</b>       | 405    | 462      | 31.3                   |
| <b>Denmark (DEN)</b>       | 504    | 541      | 36.7                   |
| <b>Finland (FIN)</b>       | 561    | 1017     | 47.3                   |
| <b>Germany (GER)</b>       | 206    | 605      | 23.2                   |
| <b>Ireland (IRE)</b>       | 683    | 532      | 41.4                   |
| <b>Italy (ITA)</b>         | 863    | 775      | 52.8                   |
| <b>Netherlands (NET)</b>   | 46     | 194      | 9.2                    |
| <b>Norway (NOR)</b>        | 738    | 1027     | 54.4                   |
| <b>Sardinia (SAR)</b>      | 909    | 576      | 47.5                   |
| <b>Spain (SPA)</b>         | 815    | 786      | 51.9                   |
| <b>Sweden (SWE)</b>        | 1,100  | 1,251    | 67.8                   |
| <b>UK(new)<sup>*</sup></b> | 1,395  | 8        | -                      |
| <b>UK</b>                  | 928    | 2,952    | 95.0 <sup>‡</sup>      |
| <b>US</b>                  | 1,394  | 2,466    | 84.4                   |
| <b>Total</b>               | 11,019 | 13,616   | 99.7 <sup>§</sup>      |

\* The new UK cases include 878 from the Northwest of the UK and 517 from Wales.

† This column indicates the power to demonstrate nominally significant association ( $p < 5\%$ ) to a susceptibility allele with Odds Ratio = 1.2 and a background frequency of 80% (assuming that there is total linkage disequilibrium between the tested variant and the causative variant, and a multiplicative model).

‡ The power for the UK cohort was calculated based on including all samples, new and original.

§ In the Total row the power to demonstrate highly significant association ( $p < 5 \times 10^{-7}$ ) is shown (the power to demonstrate nominally significant association is 100%).

### Trio Family Cohorts

|                       | <b>Trio Families</b> | <b>Power* / %</b> |
|-----------------------|----------------------|-------------------|
| <b>Belgium (BEL)</b>  | 114                  | 11.8              |
| <b>Finland (FIN)</b>  | 254                  | 20.4              |
| <b>France (FRA)</b>   | 540                  | 37.7              |
| <b>Sardinia (SAR)</b> | 363                  | 27.1              |
| <b>UK</b>             | 833                  | 53.4              |
| <b>US</b>             | 707 <sup>†</sup>     | 46.9              |
| <b>Total</b>          | 2,811                | 96.4              |

\* This column indicates the power to demonstrate nominally significant association ( $p < 5\%$ ) to a susceptibility allele with Odds Ratio = 1.2 and a background frequency of 80% (assuming that there is total linkage disequilibrium between the tested variant and the causative variant and a multiplicative model).

<sup>†</sup> Eleven of these trios consisted of discordant sib trios for which no parental DNA was available.

NOTE: the data from the German and French Cohorts for all three markers has previously been reported in *Genes and Immunity* (2008, 9; 259-63) as has the data from the Netherlands (electronically published in April in the same journal). Likewise the data from Sweden and most of the data from Ireland for rs6897932 has previously been reported in *Nature Genetics* (2007, 38; 1108-13) and the *New England Journal of Medicine* (2008, 358; 753-4) respectively.

Marker performance in the individual case-control cohorts is shown in the table below

| <b>POP</b> | <b>SNP</b> | <b>Missingness / %</b> | <b>HWE_Case / p-value</b> | <b>HWE_Control / p-value</b> |
|------------|------------|------------------------|---------------------------|------------------------------|
| <b>AUS</b> | rs6897932  | 2.90                   | 0.8011                    | 0.6788                       |
| <b>AUS</b> | rs2104286  | 2.12                   | 0.6823                    | 0.9055                       |
| <b>AUS</b> | rs12722489 | 2.12                   | 0.2451                    | 0.2499                       |
| <b>BEL</b> | rs6897932  | 1.50                   | 0.3835                    | 0.3465                       |
| <b>BEL</b> | rs2104286  | 0.58                   | 0.1478                    | 0.3455                       |
| <b>BEL</b> | rs12722489 | 0.46                   | 0.5801                    | 0.5224                       |
| <b>DEN</b> | rs6897932  | 0.86                   | 0.0051                    | 0.8332                       |
| <b>DEN</b> | rs2104286  | 0.38                   | 0.7983                    | 0.0257                       |
| <b>DEN</b> | rs12722489 | 0.67                   | 1.0000                    | 0.7879                       |
| <b>FIN</b> | rs6897932  | 4.12                   | 0.8345                    | 0.7838                       |
| <b>FIN</b> | rs2104286  | 0.63                   | 0.5716                    | 0.8561                       |
| <b>FIN</b> | rs12722489 | 0.33                   | 1.0000                    | 1.0000                       |
| <b>GER</b> | rs6897932  | 0.49                   | 0.6924                    | 0.4526                       |
| <b>GER</b> | rs2104286  | 1.11                   | 0.1202                    | 0.4442                       |
| <b>GER</b> | rs12722489 | 0.37                   | 0.1534                    | 0.1068                       |
| <b>NED</b> | rs6897932  | 0.00                   | 0.0936                    | 0.8674                       |
| <b>NED</b> | rs2104286  | 0.00                   | 1.0000                    | 0.8358                       |
| <b>NED</b> | rs12722489 | 0.00                   | 0.5699                    | 0.7103                       |
| <b>IRE</b> | rs6897932  | 0.16                   | 0.0504                    | 0.9111                       |
| <b>IRE</b> | rs2104286  | 0.00                   | 0.1228                    | 0.0665                       |
| <b>IRE</b> | rs12722489 | 0.00                   | 1.0000                    | 0.0983                       |
| <b>ITA</b> | rs6897932  | 1.71                   | 0.6630                    | 0.5365                       |
| <b>ITA</b> | rs2104286  | 1.40                   | 0.8257                    | 0.9105                       |
| <b>ITA</b> | rs12722489 | 1.89                   | 0.4354                    | 0.4408                       |
| <b>NOR</b> | rs6897932  | 6.06                   | 0.6803                    | 0.8211                       |
| <b>NOR</b> | rs2104286  | 3.06                   | 0.8404                    | 0.7097                       |
| <b>NOR</b> | rs12722489 | 1.87                   | 0.8962                    | 0.2051                       |
| <b>SAR</b> | rs6897932  | 3.10                   | 0.5038                    | 0.7408                       |
| <b>SAR</b> | rs2104286  | 1.62                   | 0.3862                    | 0.8785                       |
| <b>SAR</b> | rs12722489 | 1.48                   | 0.1814                    | 0.8124                       |
| <b>SPA</b> | rs6897932  | 1.75                   | 3.21E-07                  | 0.0002                       |
| <b>SPA</b> | rs2104286  | 1.19                   | 0.6409                    | 0.0514                       |
| <b>SPA</b> | rs12722489 | 1.25                   | 0.0064                    | 0.1539                       |
| <b>SWE</b> | rs6897932  | 3.62                   | 0.2239                    | 0.5391                       |
| <b>SWE</b> | rs2104286  | 10.00                  | 0.9329                    | 1.0000                       |
| <b>SWE</b> | rs12722489 | 6.76                   | 0.1661                    | 0.1763                       |
| <b>UK</b>  | rs6897932  | 0.47                   | 0.6889                    | 0.3820                       |
| <b>UK</b>  | rs2104286  | 3.07                   | 0.0127                    | 0.5564                       |
| <b>UK</b>  | rs12722489 | 1.80                   | 0.7844                    | 0.3572                       |
| <b>US</b>  | rs6897932  | 0.28                   | 0.8757                    | 0.3409                       |
| <b>US</b>  | rs2104286  | 0.78                   | 0.0043                    | 0.1491                       |
| <b>US</b>  | rs12722489 | 0.03                   | 0.7035                    | 0.6871                       |

HWE = Hardy Weinberg Equilibrium. The significance of any deviation from HWE is shown.

Marker performance in the individual trio family cohorts is shown in the table below

| <b>POP</b> | <b>SNP</b> | <b>Missingness /<br/>%</b> | <b>HWE_Parents /<br/>p-value</b> |
|------------|------------|----------------------------|----------------------------------|
| <b>BEL</b> | rs6897932  | 0.58                       | 0.4643                           |
| <b>BEL</b> | rs2104286  | 0.00                       | 1.0000                           |
| <b>BEL</b> | rs12722489 | 0.88                       | 1.0000                           |
| <b>FIN</b> | rs6897932  | 1.05                       | 0.3008                           |
| <b>FIN</b> | rs2104286  | 3.67                       | 1.0000                           |
| <b>FIN</b> | rs12722489 | 3.98                       | 0.6757                           |
| <b>FRA</b> | rs6897932  | 1.67                       | 0.4013                           |
| <b>FRA</b> | rs2104286  | 3.02                       | 0.5805                           |
| <b>FRA</b> | rs12722489 | 2.16                       | 0.7666                           |
| <b>SAR</b> | rs6897932  | 1.47                       | 0.6835                           |
| <b>SAR</b> | rs2104286  | 3.12                       | 1.0000                           |
| <b>SAR</b> | rs12722489 | 3.12                       | 0.8086                           |
| <b>UK</b>  | rs6897932  | 0.32                       | 0.5203                           |
| <b>UK</b>  | rs2104286  | 2.80                       | 0.1724                           |
| <b>UK</b>  | rs12722489 | 2.48                       | 0.4968                           |
| <b>US</b>  | rs6897932  | 0.42                       | 0.1213                           |
| <b>US</b>  | rs2104286  | 2.97                       | 0.0071                           |
| <b>US</b>  | rs12722489 | 1.08                       | 0.1786                           |

HWE = Hardy Weinberg Equilibrium. The significance of any deviation from HWE is shown.

Testing for HWE in the parents is less than ideal since the presence of genuine association is expected to produce a degree of deviation.

The table below shows the number of successful genotypes for each marker as well as the degree of missingness and the evidence for deviation from Hardy Weinberg Equilibrium (HWE) in cases, controls and trio families as combined groups. Although the degree of difference in missingness between cases and controls is highly significant for all three markers the extent of this difference is insufficient to account for the observed associations (even if all failures were confined to a single genotype).

|                         | <b>rs6897932</b> | <b>rs2104286</b> | <b>rs12722489</b> |
|-------------------------|------------------|------------------|-------------------|
| <b>Genotypes</b>        |                  |                  |                   |
| - Cases                 | 10,711           | 10,488           | 10,609            |
| - Controls              | 13,475           | 13,400           | 13,106            |
| - Trio Families         | 8,363            | 7,770            | 7,828             |
| <b>Missingness* / %</b> |                  |                  |                   |
| - Cases                 | 2.80             | 3.39             | 2.28              |
| - Controls              | 1.04             | 1.66             | 1.14              |
| - Trio Families         | 0.83             | 2.85             | 2.13              |
| <b>HWE (p-value)</b>    |                  |                  |                   |
| - Cases                 | 0.00062          | 0.00012          | 0.0085            |
| - Controls              | 0.12             | 0.18             | 0.80              |
| - Trio Parents          | 0.43             | 0.014            | 0.15              |

\* Because some groups did not attempt the typing of each marker in all their available samples the denominator in these calculations varies.

HWE = Hardy Weinberg Equilibrium. The significance of any deviation from HWE is shown.

Results for individual population specific Case Control studies

|                   | RAF_Case / % | RAF_Control / % | p-value   | Odds Ratio (CI)       |
|-------------------|--------------|-----------------|-----------|-----------------------|
| <b>rs6897932</b>  |              |                 |           |                       |
| AUS               | 75.6         | 76.8            | 0.5728    | 0.938 (0.752 - 1.171) |
| BEL               | 77.9         | 72.8            | 0.01515   | 1.317 (1.054 - 1.645) |
| DEN               | 77.0         | 71.1            | 0.002127  | 1.363 (1.118 - 1.661) |
| FIN               | 69.7         | 64.0            | 0.001943  | 1.291 (1.098 - 1.517) |
| GER               | 77.0         | 74.6            | 0.3452    | 1.136 (0.872 - 1.480) |
| NET               | 76.1         | 69.1            | 0.1850    | 1.425 (0.843 - 2.409) |
| IRE               | 73.3         | 73.6            | 0.8660    | 0.984 (0.821 - 1.181) |
| ITA               | 80.4         | 77.1            | 0.02226   | 1.218 (1.028 - 1.443) |
| NOR               | 74.1         | 70.7            | 0.03533   | 1.184 (1.012 - 1.386) |
| SAR               | 76.9         | 74.5            | 0.1351    | 1.142 (0.960 - 1.359) |
| SPA               | 75.4         | 72.7            | 0.08045   | 1.153 (0.983 - 1.352) |
| SWE               | 74.6         | 69.8            | 0.0003386 | 1.270 (1.114 - 1.447) |
| UK                | 76.1         | 72.4            | 1.69E-05  | 1.214 (1.111 - 1.327) |
| US                | 78.1         | 74.4            | 0.0002750 | 1.227 (1.099 - 1.370) |
| <b>rs2104286</b>  |              |                 |           |                       |
| AUS               | 78.1         | 71.0            | 0.0006887 | 1.453 (1.170 - 1.803) |
| BEL               | 80.9         | 77.9            | 0.1192    | 1.205 (0.952 - 1.524) |
| DEN               | 77.4         | 69.5            | 4.55E-05  | 1.504 (1.236 - 1.832) |
| FIN               | 81.6         | 77.7            | 0.009948  | 1.274 (1.059 - 1.531) |
| GER               | 80.0         | 75.2            | 0.04702   | 1.323 (1.003 - 1.744) |
| NET               | 80.4         | 77.8            | 0.5863    | 1.171 (0.663 - 2.066) |
| IRE               | 75.5         | 69.7            | 0.003048  | 1.336 (1.103 - 1.618) |
| ITA               | 80.8         | 79.8            | 0.5019    | 1.061 (0.892 - 1.263) |
| NOR               | 75.2         | 69.6            | 0.0003095 | 1.326 (1.137 - 1.547) |
| SAR               | 86.7         | 83.4            | 0.01565   | 1.292 (1.049 - 1.590) |
| SPA               | 81.4         | 77.4            | 0.005684  | 1.276 (1.073 - 1.517) |
| SWE               | 74.8         | 72.4            | 0.08226   | 1.129 (0.984 - 1.296) |
| UK                | 75.4         | 71.6            | 1.73E-05  | 1.216 (1.112 - 1.330) |
| US                | 78.3         | 74.7            | 0.0002873 | 1.228 (1.099 - 1.372) |
| <b>rs12722489</b> |              |                 |           |                       |
| AUS               | 88.6         | 85.0            | 0.02249   | 1.382 (1.046 - 1.826) |
| BEL               | 89.9         | 87.4            | 0.1023    | 1.285 (0.951 - 1.736) |
| DEN               | 85.2         | 80.1            | 0.001979  | 1.436 (1.141 - 1.807) |
| FIN               | 87.5         | 86.7            | 0.5411    | 1.078 (0.848 - 1.369) |
| GER               | 88.6         | 85.2            | 0.08751   | 1.347 (0.956 - 1.898) |
| NET               | 84.8         | 88.9            | 0.2703    | 0.694 (0.362 - 1.332) |
| IRE               | 84.6         | 80.6            | 0.01542   | 1.322 (1.054 - 1.657) |
| ITA               | 90.2         | 89.6            | 0.5127    | 1.080 (0.858 - 1.359) |
| NOR               | 82.8         | 77.6            | 0.0001834 | 1.387 (1.168 - 1.648) |
| SAR               | 93.1         | 90.1            | 0.003486  | 1.487 (1.138 - 1.943) |
| SPA               | 79.7         | 79.3            | 0.8233    | 1.020 (0.858 - 1.212) |
| SWE               | 82.1         | 81.5            | 0.5990    | 1.042 (0.894 - 1.216) |
| UK                | 86.6         | 83.2            | 1.15E-06  | 1.313 (1.176 - 1.465) |
| US                | 88.0         | 85.4            | 0.001235  | 1.257 (1.094 - 1.444) |

RAF = Risk Allele Frequency, CI = 95% Confidence Interval.

Results for individual population specific Trio Family studies

|                   | RAF_Index / % | RAF_Parents / % | p-value   | Odds Ratio (CI)       |
|-------------------|---------------|-----------------|-----------|-----------------------|
| <b>rs6897932</b>  |               |                 |           |                       |
| <b>BEL</b>        | 77.2          | 76.1            | 0.6506    | 1.108 (0.711 - 1.728) |
| <b>FIN</b>        | 69.4          | 68.9            | 0.7243    | 1.051 (0.797 - 1.386) |
| <b>FRA</b>        | 77.3          | 75.9            | 0.07672   | 1.197 (0.980 - 1.460) |
| <b>SAR</b>        | 77.2          | 75.8            | 0.1482    | 1.200 (0.937 - 1.537) |
| <b>UK</b>         | 75.8          | 74.3            | 0.05778   | 1.162 (0.995 - 1.358) |
| <b>US</b>         | 77.8          | 76.5            | 0.1673    | 1.136 (0.948 - 1.361) |
| <b>rs2104286</b>  |               |                 |           |                       |
| <b>BEL</b>        | 80.3          | 77.9            | 0.2159    | 1.324 (0.848 - 2.066) |
| <b>FIN</b>        | 81.2          | 73.8            | 0.02181   | 2.834 (1.117 - 7.184) |
| <b>FRA</b>        | 81.9          | 78.7            | 0.0003766 | 1.465 (1.186 - 1.811) |
| <b>SAR</b>        | 86.0          | 85.2            | 0.1062    | 1.284 (0.947 - 1.740) |
| <b>UK</b>         | 75.3          | 74.2            | 0.1754    | 1.118 (0.952 - 1.313) |
| <b>US</b>         | 78.7          | 76.5            | 0.004672  | 1.314 (1.087 - 1.588) |
| <b>rs12722489</b> |               |                 |           |                       |
| <b>BEL</b>        | 86.7          | 86.3            | 0.7855    | 1.077 (0.631 - 1.837) |
| <b>FIN</b>        | 87.7          | 83.1            | 0.1088    | 2.500 (0.784 - 7.968) |
| <b>FRA</b>        | 89.1          | 88.4            | 0.1950    | 1.194 (0.913 - 1.562) |
| <b>SAR</b>        | 92.0          | 91.6            | 0.4904    | 1.146 (0.778 - 1.688) |
| <b>UK</b>         | 86.3          | 85.0            | 0.04658   | 1.220 (1.003 - 1.484) |
| <b>US</b>         | 87.5          | 86.2            | 0.02129   | 1.297 (1.039 - 1.620) |

RAF = Risk Allele Frequency, CI = 95% Confidence Interval.

The results are shown graphically in the following figures.

Figures showing allele frequencies in population specific case-control cohorts

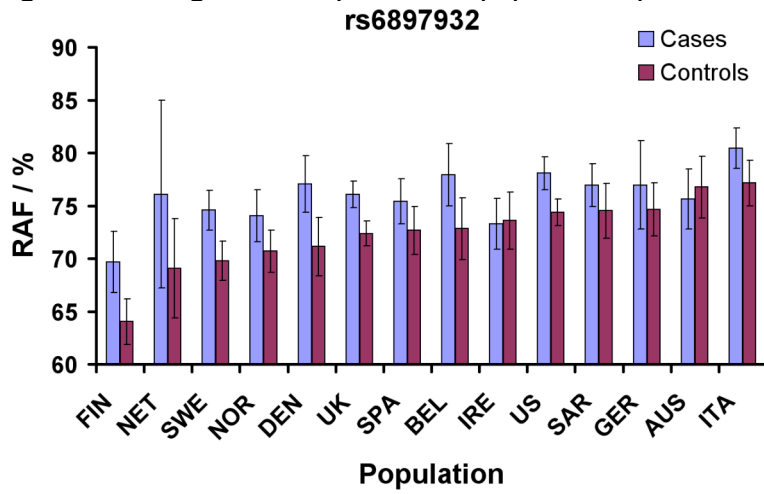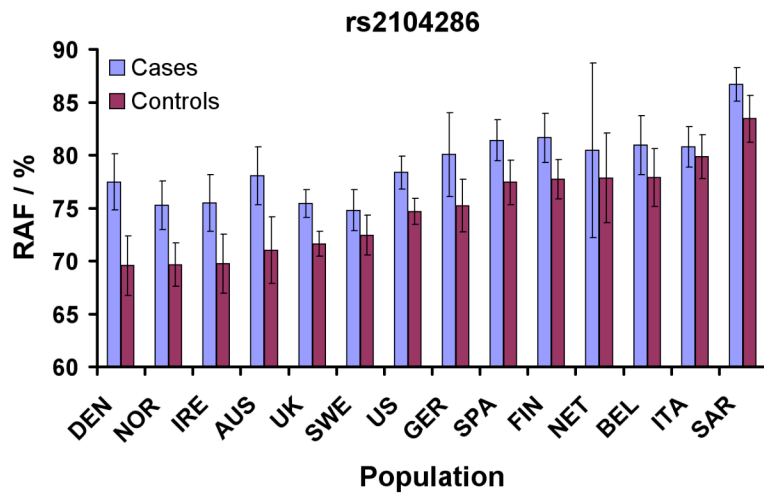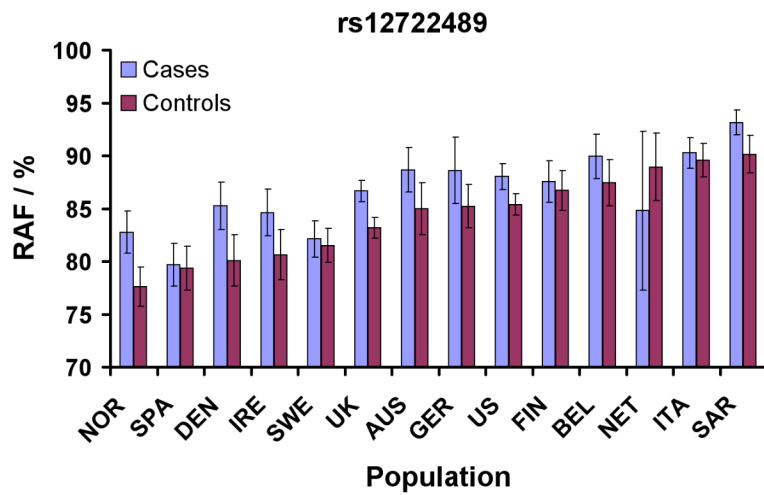

In each figure the populations have been ranked according to the RAF in the controls.



Figures showing allele frequencies in population specific trio family cohorts

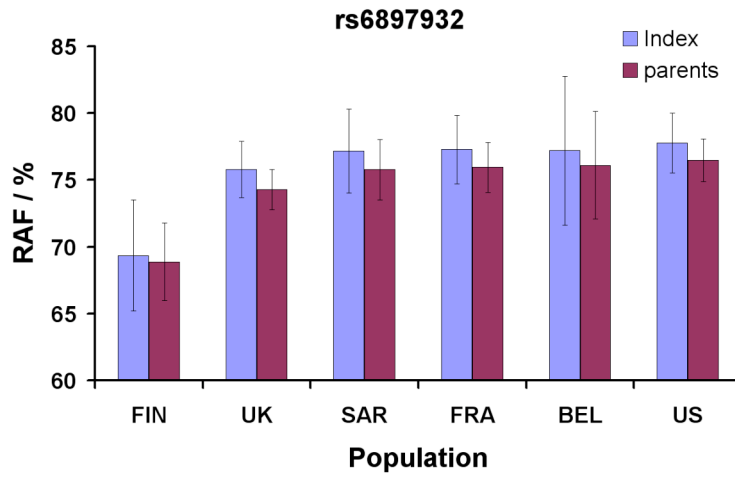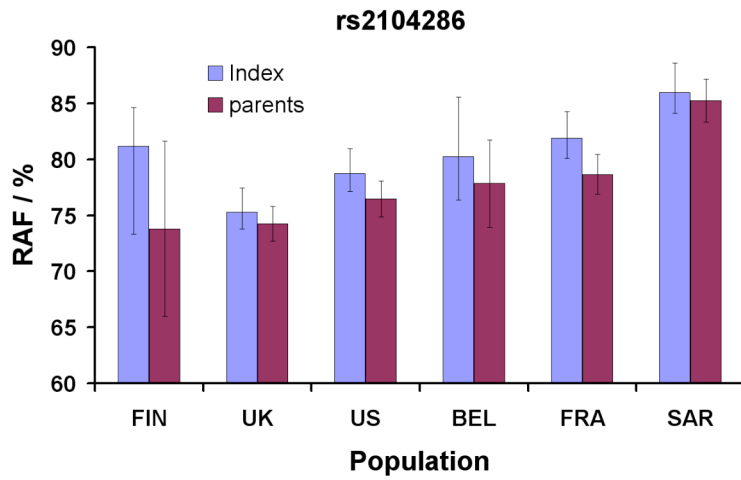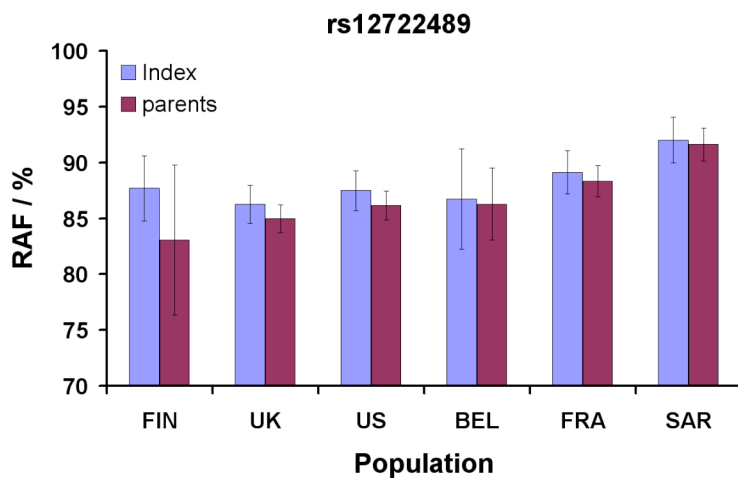

In each figure the populations have been ranked according to the RAF in the controls.

## Trios

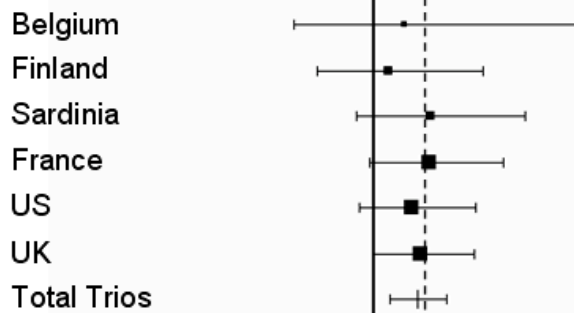

## Case-Control

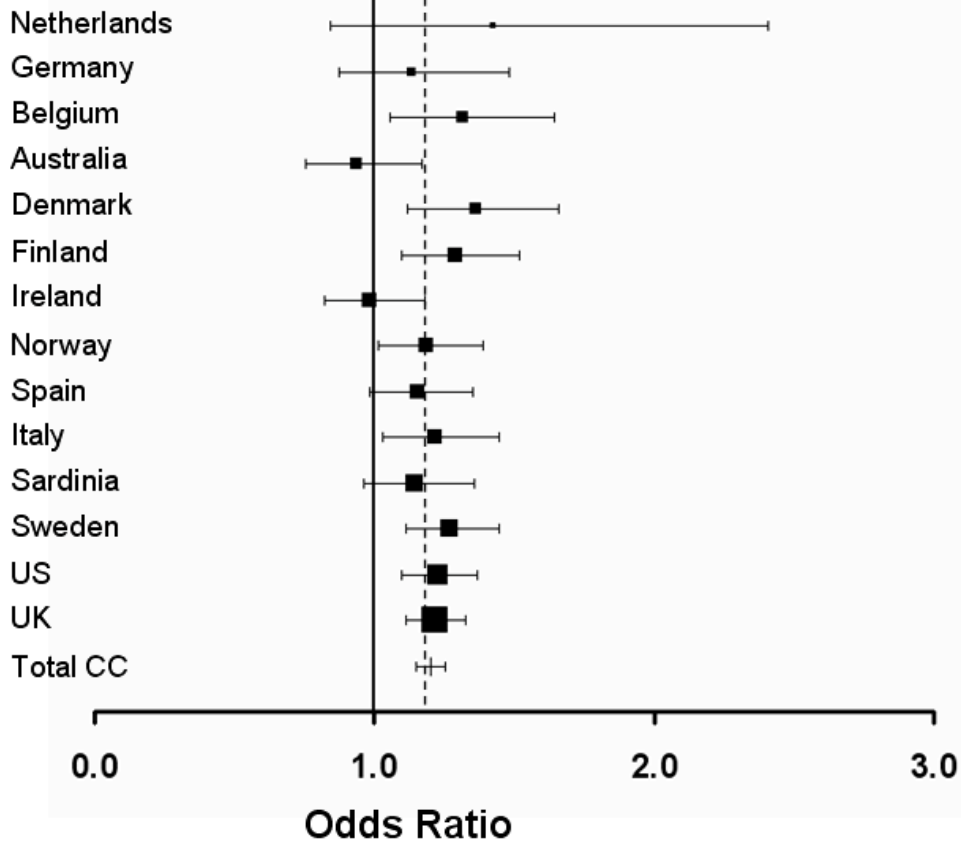

### Odds Ratio for the major (C) allele of rs6897932.

Results to the right of the Odds Ratio = 1.0 line are consistent with the original IMSGC screen. The area of the box is proportional to the number of cases included in the respective cohort (no such boxes are included for the analyses based on combined data sets). The dotted line indicates the average Odds Ratio between the combined case-control and combined trio family analyses. Results are plotted in order of sample size.

## Trios

Belgium  
Finland  
Sardinia  
France  
US  
UK  
Total Trios

## Case-Control

Netherlands  
Germany  
Belgium  
Australia  
Denmark  
Finland  
Ireland  
Norway  
Spain  
Italy  
Sardinia  
Sweden  
US  
UK  
Total CC

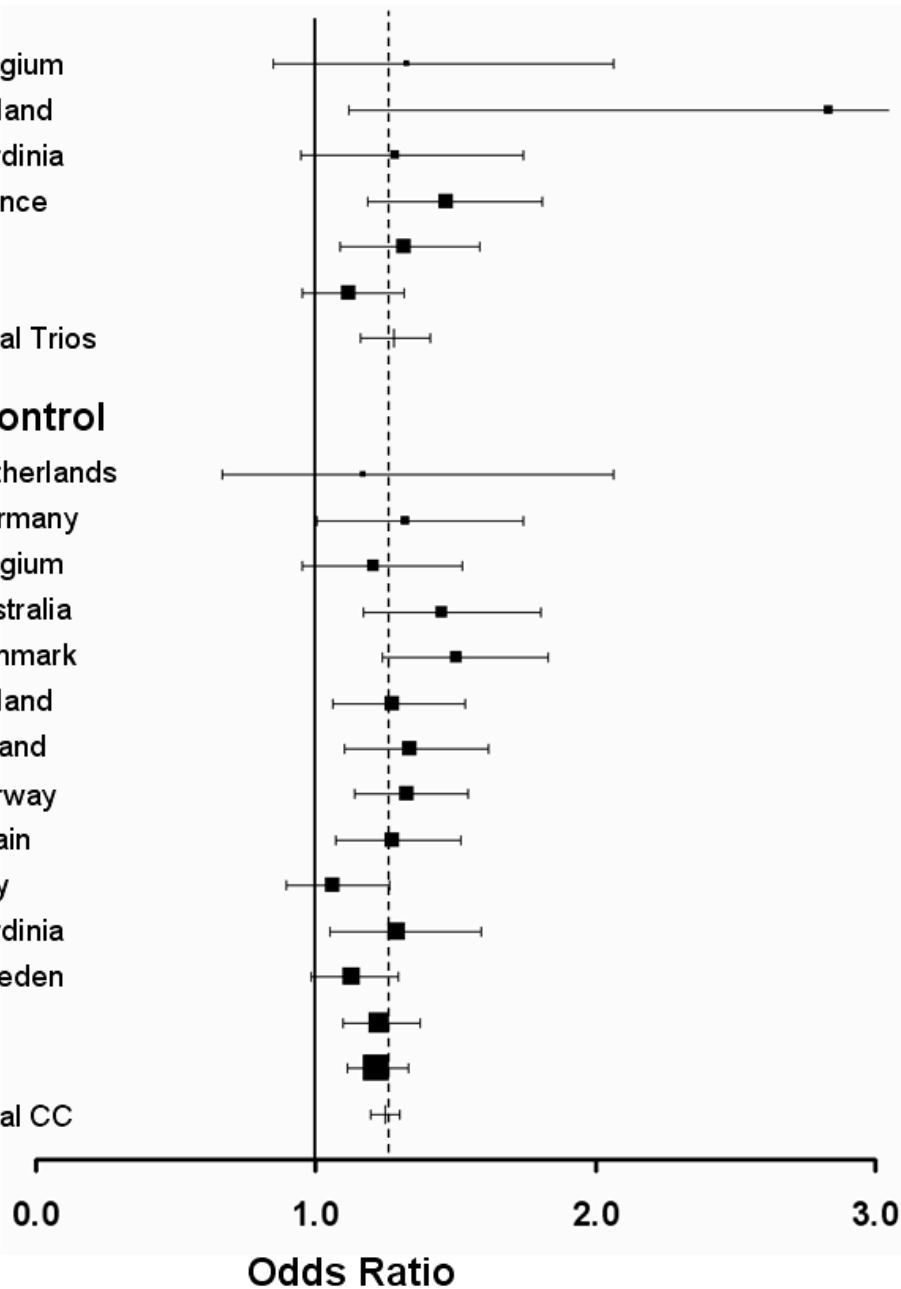

### Odds Ratio for the major (T) allele of rs2104286.

Results to the right of the Odds Ratio = 1.0 line are consistent with the original IMSGC screen. The area of the box is proportional to the number of cases included in the respective cohort (no such boxes are included for the analyses based on combined data sets). The dotted line indicates the average Odds Ratio between the combined case-control and combined trio family analyses. Results are plotted in order of sample size. Note only a fraction of the Finnish trios were typed for this marker.

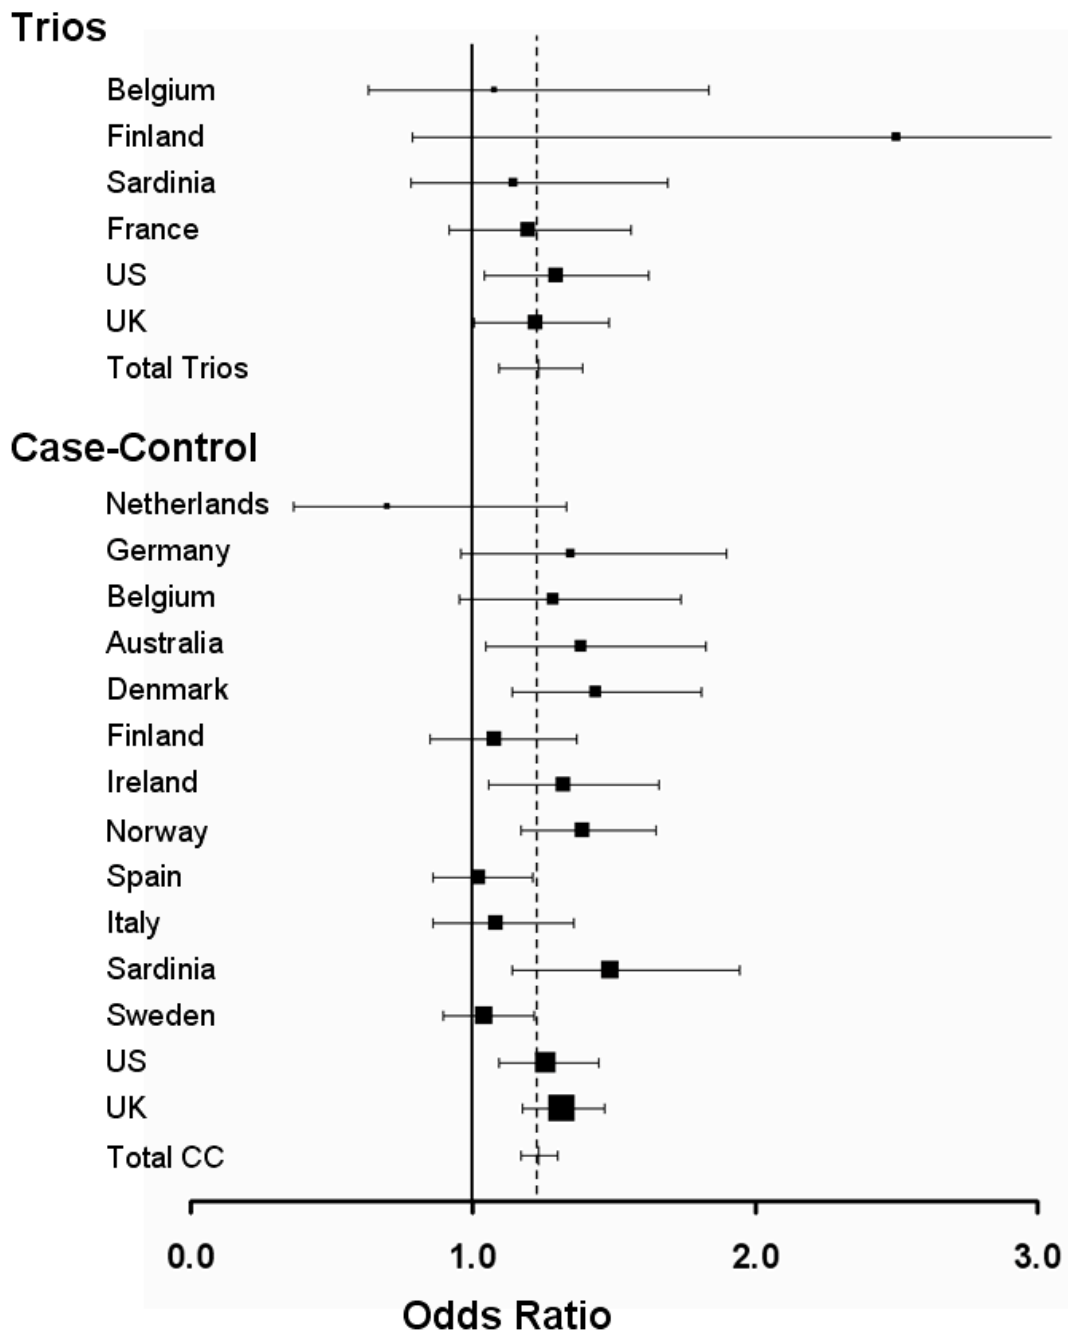

**Odds Ratio for the major (C) allele of rs12722489.**

Results to the right of the Odds Ratio = 1.0 line are consistent with the original IMSGC screen. The area of the box is proportional to the number of cases included in the respective cohort (no such boxes are included for the analyses based on combined data sets). The dotted line indicates the average Odds Ratio between the combined case-control and combined trio family analyses. Results are plotted in order of sample size. Note only a fraction of the Finnish trios were typed for this marker.

### Homogeneity testing

Applying the Breslow-Day test to the 14 case control cohorts confirmed that there is no statistically significant evidence for heterogeneity of effect.

| SNP        | CHISQ | p-value |
|------------|-------|---------|
| rs6897932  | 14.51 | 0.34    |
| rs2104286  | 12.75 | 0.47    |
| rs12722489 | 22.83 | 0.044   |

### Linkage disequilibrium (LD)

The expected LD between rs2104286 and rs12722489 is confirmed

|              | D' Cases | D' Controls | r <sup>2</sup> Cases | r <sup>2</sup> Controls |
|--------------|----------|-------------|----------------------|-------------------------|
| Case-Control | 0.917    | 0.930       | 0.475                | 0.477                   |
| Trios        | 1.000    | 0.994       | 0.517                | 0.486                   |

### Does rs12722489 exert any effect independent of rs2104286?

In order to determine whether the signal from rs12722489 was just a reflection of LD with rs2104286 conditional analyses were performed using UNPHASED.

There is no evidence for any allelic effect from rs12722489 independent of rs2104286.

|              | Chisq  | p-value |
|--------------|--------|---------|
| Case-Control | 0.7848 | 0.38    |
| Trios        | 0.1818 | 0.67    |

And no evidence that rs12722489 interacts with rs2104286 to influence risk

|              | Chisq  | p-value |
|--------------|--------|---------|
| Case-Control | 0.0484 | 0.83    |
| Trios        | 4.559  | 0.033   |

These data indicate that the signal from rs12722489 is entirely a reflection of its LD with rs2104286. For completeness the reverse conditioning shows that rs2104286 does exert an allelic effect after correcting for rs12722489.

|              | Chisq | p-value  |
|--------------|-------|----------|
| Case-Control | 53.28 | 2.90E-13 |
| Trios        | 16.04 | 0.000062 |

## Genotypic testing

**Table** Genotypic testing in the 14 case control cohorts combined

|                                     | <b>Chi2*</b> | <b>p-value</b> | <b>Genotype</b> | <b>Odds Ratio (CI)</b> |
|-------------------------------------|--------------|----------------|-----------------|------------------------|
| <b>rs6897932</b><br><b>(IL7R)</b>   | 87.4         | 1.05E-19       | C/C             | 1.390 (1.255-1.539)    |
|                                     |              |                | C/T             | 1.115 (1.004-1.238)    |
|                                     |              |                | T/T             | Reference              |
| <b>rs2104286</b><br><b>(IL2RA)</b>  | 123.5        | 1.53E-27       | T/T             | 1.476 (1.322-1.648)    |
|                                     |              |                | C/T             | 1.124 (1.003-1.259)    |
|                                     |              |                | C/C             | Reference              |
| <b>rs12722489</b><br><b>(IL2RA)</b> | 74.36        | 7.11E-17       | C/C             | 1.351 (1.139-1.602)    |
|                                     |              |                | C/T             | 1.054 (0.884-1.256)    |
|                                     |              |                | T/T             | Reference              |

CI = 95% confidence interval

\* A 2 degree of freedom test
